# Supplementary material for: Different Modular Organization Between Early Onset and Late Onset Depression: A Study Base on Granger Causality Analysis
Source: PubMed Central journal article supplement (PMC7900556; doi:10.3389/fnagi.2021.625175), 2021-02-09
Supplement: Data_Sheet_1.pdf [file Data_Sheet_1.pdf]

Supplemental Table 1. List of total 372 nodes, and their MNI coordinates

| ROI                  | MNI coordinates |     |     | ROI                   | MNI coordinates |     |     |
|----------------------|-----------------|-----|-----|-----------------------|-----------------|-----|-----|
|                      | X               | Y   | Z   |                       | X               | Y   | Z   |
| Left-Accumbens-area  | -9              | 13  | -7  | Right-Accumbens-area  | 10              | 14  | -7  |
| Left-Amygdala        | -23             | -2  | -19 | Right-Amygdala        | 25              | -1  | -19 |
| Left-Caudate         | -14             | 8   | 11  | Right-Caudate         | 14              | 10  | 10  |
| Left-Hippocampus     | -26             | -22 | -12 | Right-Hippocampus     | 27              | -19 | -12 |
| Left-Pallidum        | -20             | -2  | -2  | Right-Pallidum        | 20              | -1  | -1  |
| Left-Putamen         | -26             | 2   | 0   | Right-Putamen         | 26              | 4   | 0   |
| Left-Thalamus-Proper | -13             | -17 | 6   | Right-Thalamus-Proper | 10              | -16 | 6   |
| Lh.L_10d_ROI         | -10             | 65  | 11  | Rh.R_10d_ROI          | 11              | 66  | 6   |
| Lh.L_10pp_ROI        | -12             | 62  | -13 | Rh.R_10pp_ROI         | 13              | 61  | -13 |
| Lh.L_10r_ROI         | -6              | 52  | -7  | Rh.R_10r_ROI          | 9               | 48  | -8  |
| Lh.L_10v_ROI         | -4              | 53  | -15 | Rh.R_10v_ROI          | 6               | 51  | -14 |
| Lh.L_11l_ROI         | -25             | 47  | -14 | Rh.R_11l_ROI          | 26              | 44  | -16 |
| Lh.L_13l_ROI         | -22             | 30  | -19 | Rh.R_13l_ROI          | 22              | 28  | -20 |
| Lh.L_1_ROI           | -44             | -26 | 57  | Rh.R_1_ROI            | 47              | -26 | 54  |
| Lh.L_23c_ROI         | -11             | -28 | 47  | Rh.R_23c_ROI          | 9               | -31 | 48  |
| Lh.L_23d_ROI         | -3              | -21 | 41  | Rh.R_23d_ROI          | 4               | -22 | 42  |
| Lh.L_24dd_ROI        | -6              | -18 | 54  | Rh.R_24dd_ROI         | 7               | -18 | 56  |
| Lh.L_24dv_ROI        | -9              | -4  | 48  | Rh.R_24dv_ROI         | 8               | -6  | 49  |
| Lh.L_25_ROI          | -5              | 23  | -11 | Rh.R_25_ROI           | 4               | 23  | -12 |
| Lh.L_2_ROI           | -38             | -33 | 51  | Rh.R_2_ROI            | 36              | -33 | 50  |
| Lh.L_31a_ROI         | -5              | -39 | 48  | Rh.R_31a_ROI          | 5               | -40 | 47  |
| Lh.L_31pd_ROI        | -9              | -50 | 39  | Rh.R_31pd_ROI         | 9               | -52 | 37  |
| Lh.L_31pv_ROI        | -8              | -46 | 36  | Rh.R_31pv_ROI         | 7               | -44 | 37  |
| Lh.L_33pr_ROI        | -4              | 14  | 28  | Rh.R_33pr_ROI         | 4               | 11  | 28  |
| Lh.L_3a_ROI          | -30             | -20 | 52  | Rh.R_3a_ROI           | 36              | -20 | 46  |
| Lh.L_3b_ROI          | -36             | -23 | 56  | Rh.R_3b_ROI           | 39              | -23 | 53  |
| Lh.L_43_ROI          | -56             | -2  | 7   | Rh.R_43_ROI           | 60              | 3   | 10  |
| Lh.L_44_ROI          | -56             | 13  | 21  | Rh.R_44_ROI           | 54              | 17  | 22  |
| Lh.L_45_ROI          | -51             | 26  | 7   | Rh.R_45_ROI           | 55              | 26  | 6   |
| Lh.L_46_ROI          | -36             | 43  | 28  | Rh.R_46_ROI           | 35              | 45  | 26  |
| Lh.L_47l_ROI         | -47             | 27  | -6  | Rh.R_47l_ROI          | 49              | 26  | -9  |
| Lh.L_47m_ROI         | -37             | 29  | -12 | Rh.R_47m_ROI          | 35              | 32  | -17 |
| Lh.L_47s_ROI         | -32             | 23  | -18 | Rh.R_47s_ROI          | 32              | 22  | -19 |
| Lh.L_4_ROI           | -28             | -16 | 57  | Rh.R_4_ROI            | 28              | -19 | 59  |
| Lh.L_52_ROI          | -40             | -18 | 0   | Rh.R_52_ROI           | 38              | -19 | 4   |
| Lh.L_55b_ROI         | -48             | 1   | 47  | Rh.R_55b_ROI          | 50              | -2  | 49  |
| Lh.L_5L_ROI          | -8              | -45 | 70  | Rh.R_5L_ROI           | 11              | -46 | 77  |
| Lh.L_5m_ROI          | -6              | -35 | 72  | Rh.R_5m_ROI           | 4               | -39 | 66  |
| Lh.L_5mv_ROI         | -13             | -36 | 52  | Rh.R_5mv_ROI          | 11              | -38 | 54  |
| Lh.L_6a_ROI          | -24             | 0   | 54  | Rh.R_6a_ROI           | 29              | -1  | 54  |
| Lh.L_6d_ROI          | -36             | -16 | 66  | Rh.R_6d_ROI           | 40              | -15 | 62  |

|                 |     |     |     |                 |    |     |     |
|-----------------|-----|-----|-----|-----------------|----|-----|-----|
| Lh.L_6ma_ROI    | -21 | 7   | 65  | Rh.R_6ma_ROI    | 20 | 7   | 65  |
| Lh.L_6mp_ROI    | -18 | -10 | 71  | Rh.R_6mp_ROI    | 21 | -13 | 68  |
| Lh.L_6r_ROI     | -53 | 5   | 17  | Rh.R_6r_ROI     | 51 | 8   | 20  |
| Lh.L_6v_ROI     | -57 | 6   | 32  | Rh.R_6v_ROI     | 57 | 5   | 35  |
| Lh.L_7AL_ROI    | -16 | -55 | 68  | Rh.R_7AL_ROI    | 17 | -56 | 73  |
| Lh.L_7Am_ROI    | -8  | -59 | 58  | Rh.R_7Am_ROI    | 5  | -58 | 63  |
| Lh.L_7m_ROI     | -4  | -62 | 37  | Rh.R_7m_ROI     | 5  | -64 | 36  |
| Lh.L_7PC_ROI    | -31 | -55 | 62  | Rh.R_7PC_ROI    | 33 | -52 | 64  |
| Lh.L_7PL_ROI    | -12 | -74 | 56  | Rh.R_7PL_ROI    | 9  | -71 | 60  |
| Lh.L_7Pm_ROI    | -4  | -69 | 51  | Rh.R_7Pm_ROI    | 8  | -68 | 50  |
| Lh.L_8Ad_ROI    | -22 | 29  | 42  | Rh.R_8Ad_ROI    | 23 | 30  | 38  |
| Lh.L_8Av_ROI    | -34 | 22  | 52  | Rh.R_8Av_ROI    | 40 | 21  | 45  |
| Lh.L_8BL_ROI    | -11 | 37  | 51  | Rh.R_8BL_ROI    | 15 | 42  | 48  |
| Lh.L_8BM_ROI    | -3  | 30  | 46  | Rh.R_8BM_ROI    | 7  | 30  | 47  |
| Lh.L_8C_ROI     | -43 | 18  | 40  | Rh.R_8C_ROI     | 37 | 22  | 35  |
| Lh.L_9-46d_ROI  | -28 | 46  | 20  | Rh.R_9-46d_ROI  | 30 | 50  | 17  |
| Lh.L_9a_ROI     | -19 | 57  | 27  | Rh.R_9a_ROI     | 20 | 63  | 17  |
| Lh.L_9m_ROI     | -5  | 54  | 25  | Rh.R_9m_ROI     | 8  | 53  | 20  |
| Lh.L_9p_ROI     | -20 | 45  | 41  | Rh.R_9p_ROI     | 19 | 53  | 30  |
| Lh.L_a10p_ROI   | -28 | 57  | -6  | Rh.R_a10p_ROI   | 27 | 59  | -10 |
| Lh.L_A1_ROI     | -43 | -20 | 10  | Rh.R_A1_ROI     | 44 | -20 | 11  |
| Lh.L_a24pr_ROI  | -6  | 20  | 31  | Rh.R_a24pr_ROI  | 5  | 15  | 33  |
| Lh.L_a24_ROI    | -6  | 44  | 0   | Rh.R_a24_ROI    | 7  | 38  | 0   |
| Lh.L_a32pr_ROI  | -10 | 32  | 30  | Rh.R_a32pr_ROI  | 9  | 25  | 31  |
| Lh.L_a47r_ROI   | -40 | 44  | -12 | Rh.R_a47r_ROI   | 41 | 47  | -11 |
| Lh.L_A4_ROI     | -62 | -19 | 8   | Rh.R_A4_ROI     | 65 | -15 | 4   |
| Lh.L_A5_ROI     | -60 | -12 | -1  | Rh.R_A5_ROI     | 62 | -12 | -3  |
| Lh.L_a9-46v_ROI | -41 | 51  | 5   | Rh.R_a9-46v_ROI | 43 | 50  | 5   |
| Lh.L_AAIC_ROI   | -32 | 15  | -11 | Rh.R_AAIC_ROI   | 34 | 17  | -10 |
| Lh.L_AIP_ROI    | -38 | -38 | 46  | Rh.R_AIP_ROI    | 36 | -40 | 47  |
| Lh.L_AVI_ROI    | -31 | 25  | -1  | Rh.R_AVI_ROI    | 34 | 26  | -3  |
| Lh.L_d23ab_ROI  | -4  | -41 | 32  | Rh.R_d23ab_ROI  | 4  | -37 | 36  |
| Lh.L_d32_ROI    | -7  | 42  | 27  | Rh.R_d32_ROI    | 9  | 37  | 25  |
| Lh.L_DVT_ROI    | -19 | -69 | 32  | Rh.R_DVT_ROI    | 21 | -65 | 34  |
| Lh.L_EC_ROI     | -20 | -9  | -27 | Rh.R_EC_ROI     | 23 | -9  | -24 |
| Lh.L_FEF_ROI    | -38 | -2  | 56  | Rh.R_FEF_ROI    | 44 | -7  | 51  |
| Lh.L_FFC_ROI    | -38 | -62 | -15 | Rh.R_FFC_ROI    | 39 | -56 | -18 |
| Lh.L_FOP1_ROI   | -51 | 5   | 5   | Rh.R_FOP1_ROI   | 51 | 7   | 5   |
| Lh.L_FOP2_ROI   | -43 | -2  | 13  | Rh.R_FOP2_ROI   | 42 | -1  | 13  |
| Lh.L_FOP3_ROI   | -35 | 5   | 14  | Rh.R_FOP3_ROI   | 36 | 8   | 12  |
| Lh.L_FOP4_ROI   | -42 | 14  | 10  | Rh.R_FOP4_ROI   | 41 | 15  | 8   |
| Lh.L_FOP5_ROI   | -35 | 26  | 8   | Rh.R_FOP5_ROI   | 39 | 26  | 7   |
| Lh.L_FST_ROI    | -45 | -65 | 0   | Rh.R_FST_ROI    | 45 | -68 | -4  |
| Lh.L_i6-8_ROI   | -29 | 11  | 55  | Rh.R_i6-8_ROI   | 33 | 12  | 55  |

|                 |     |     |     |                 |    |     |     |
|-----------------|-----|-----|-----|-----------------|----|-----|-----|
| Lh.L_IFJa_ROI   | -41 | 12  | 27  | Rh.R_IFJa_ROI   | 38 | 21  | 26  |
| Lh.L_IFJp_ROI   | -40 | 5   | 30  | Rh.R_IFJp_ROI   | 34 | 7   | 30  |
| Lh.L_IFSa_ROI   | -46 | 32  | 12  | Rh.R_IFSa_ROI   | 50 | 36  | 8   |
| Lh.L_IFSp_ROI   | -47 | 26  | 25  | Rh.R_IFSp_ROI   | 48 | 30  | 24  |
| Lh.L_Ig_ROI     | -35 | -13 | 15  | Rh.R_Ig_ROI     | 36 | -11 | 15  |
| Lh.L_IP0_ROI    | -29 | -78 | 30  | Rh.R_IP0_ROI    | 33 | -71 | 33  |
| Lh.L_IP1_ROI    | -31 | -66 | 39  | Rh.R_IP1_ROI    | 37 | -63 | 50  |
| Lh.L_IP2_ROI    | -40 | -46 | 45  | Rh.R_IP2_ROI    | 42 | -45 | 46  |
| Lh.L_IPS1_ROI   | -25 | -72 | 38  | Rh.R_IPS1_ROI   | 28 | -68 | 44  |
| Lh.L_LBelt_ROI  | -45 | -23 | 8   | Rh.R_LBelt_ROI  | 48 | -22 | 8   |
| Lh.L_LIPd_ROI   | -30 | -53 | 39  | Rh.R_LIPd_ROI   | 30 | -55 | 49  |
| Lh.L_LIPv_ROI   | -32 | -61 | 50  | Rh.R_LIPv_ROI   | 26 | -58 | 56  |
| Lh.L_LO1_ROI    | -39 | -82 | 9   | Rh.R_LO1_ROI    | 39 | -81 | 6   |
| Lh.L_LO2_ROI    | -39 | -88 | -2  | Rh.R_LO2_ROI    | 45 | -79 | -3  |
| Lh.L_LO3_ROI    | -42 | -78 | 18  | Rh.R_LO3_ROI    | 43 | -80 | 14  |
| Lh.L_MBelt_ROI  | -46 | -14 | 2   | Rh.R_MBelt_ROI  | 46 | -14 | 6   |
| Lh.L_MIP_ROI    | -21 | -64 | 42  | Rh.R_MIP_ROI    | 24 | -67 | 58  |
| Lh.L_MI_ROI     | -36 | 11  | 4   | Rh.R_MI_ROI     | 39 | 11  | 3   |
| Lh.L_MST_ROI    | -43 | -66 | 8   | Rh.R_MST_ROI    | 45 | -69 | 8   |
| Lh.L_MT_ROI     | -44 | -73 | 13  | Rh.R_MT_ROI     | 45 | -71 | 12  |
| Lh.L_OFC_ROI    | -10 | 36  | -21 | Rh.R_OFC_ROI    | 10 | 36  | -22 |
| Lh.L_OP1_ROI    | -45 | -19 | 17  | Rh.R_OP1_ROI    | 43 | -19 | 18  |
| Lh.L_OP2-3_ROI  | -40 | -13 | 17  | Rh.R_OP2-3_ROI  | 40 | -11 | 18  |
| Lh.L_OP4_ROI    | -60 | -9  | 15  | Rh.R_OP4_ROI    | 57 | -9  | 14  |
| Lh.L_p10p_ROI   | -24 | 61  | 5   | Rh.R_p10p_ROI   | 27 | 58  | 3   |
| Lh.L_p24pr_ROI  | -4  | -1  | 40  | Rh.R_p24pr_ROI  | 5  | -5  | 40  |
| Lh.L_p24_ROI    | -4  | 40  | 19  | Rh.R_p24_ROI    | 6  | 34  | 17  |
| Lh.L_p32pr_ROI  | -6  | 14  | 41  | Rh.R_p32pr_ROI  | 8  | 11  | 42  |
| Lh.L_p32_ROI    | -13 | 50  | 0   | Rh.R_p32_ROI    | 10 | 46  | -1  |
| Lh.L_p47r_ROI   | -44 | 43  | 2   | Rh.R_p47r_ROI   | 46 | 42  | -7  |
| Lh.L_p9-46v_ROI | -43 | 35  | 29  | Rh.R_p9-46v_ROI | 41 | 40  | 25  |
| Lh.L_PBelt_ROI  | -52 | -22 | 9   | Rh.R_PBelt_ROI  | 58 | -18 | 8   |
| Lh.L_PCV_ROI    | -8  | -51 | 50  | Rh.R_PCV_ROI    | 6  | -53 | 50  |
| Lh.L_PeEc_ROI   | -29 | -7  | -34 | Rh.R_PeEc_ROI   | 30 | -7  | -32 |
| Lh.L_PEF_ROI    | -44 | 8   | 42  | Rh.R_PEF_ROI    | 44 | -1  | 41  |
| Lh.L_PFcm_ROI   | -48 | -29 | 18  | Rh.R_PFcm_ROI   | 48 | -30 | 21  |
| Lh.L_PFm_ROI    | -49 | -47 | 45  | Rh.R_PFm_ROI    | 52 | -49 | 39  |
| Lh.L_PFop_ROI   | -59 | -19 | 20  | Rh.R_PFop_ROI   | 63 | -21 | 22  |
| Lh.L_PF_ROI     | -58 | -29 | 34  | Rh.R_PF_ROI     | 59 | -32 | 37  |
| Lh.L_PFt_ROI    | -49 | -21 | 33  | Rh.R_PFt_ROI    | 52 | -23 | 35  |
| Lh.L_PGi_ROI    | -49 | -57 | 26  | Rh.R_PGi_ROI    | 45 | -58 | 24  |
| Lh.L_PGp_ROI    | -36 | -81 | 28  | Rh.R_PGp_ROI    | 40 | -77 | 27  |
| Lh.L_PGs_ROI    | -43 | -69 | 38  | Rh.R_PGs_ROI    | 44 | -66 | 39  |
| Lh.L_PHA1_ROI   | -19 | -33 | -12 | Rh.R_PHA1_ROI   | 20 | -32 | -13 |

|                |     |     |     |                |    |     |     |
|----------------|-----|-----|-----|----------------|----|-----|-----|
| Lh.L_PHA2_ROI  | -27 | -35 | -11 | Rh.R_PHA2_ROI  | 30 | -31 | -14 |
| Lh.L_PHA3_ROI  | -29 | -36 | -16 | Rh.R_PHA3_ROI  | 32 | -34 | -15 |
| Lh.L_PH_ROI    | -44 | -71 | -7  | Rh.R_PH_ROI    | 47 | -64 | -11 |
| Lh.L_PHT_ROI   | -57 | -56 | -4  | Rh.R_PHT_ROI   | 57 | -51 | -2  |
| Lh.L_PI_ROI    | -44 | 2   | -14 | Rh.R_PI_ROI    | 47 | -1  | -11 |
| Lh.L_Pir_ROI   | -30 | 8   | -18 | Rh.R_Pir_ROI   | 34 | 9   | -18 |
| Lh.L_PIT_ROI   | -30 | -88 | -7  | Rh.R_PIT_ROI   | 39 | -84 | -12 |
| Lh.L_pOFC_ROI  | -14 | 18  | -18 | Rh.R_pOFC_ROI  | 15 | 18  | -17 |
| Lh.L_PoI1_ROI  | -39 | -9  | -3  | Rh.R_PoI1_ROI  | 39 | -9  | -3  |
| Lh.L_PoI2_ROI  | -40 | -2  | 1   | Rh.R_PoI2_ROI  | 42 | -2  | 1   |
| Lh.L_POS1_ROI  | -12 | -56 | 14  | Rh.R_POS1_ROI  | 11 | -54 | 17  |
| Lh.L_POS2_ROI  | -9  | -71 | 38  | Rh.R_POS2_ROI  | 13 | -71 | 39  |
| Lh.L_PreS_ROI  | -20 | -28 | -9  | Rh.R_PreS_ROI  | 19 | -27 | -9  |
| Lh.L_ProS_ROI  | -22 | -54 | 6   | Rh.R_ProS_ROI  | 20 | -45 | 6   |
| Lh.L_PSL_ROI   | -59 | -44 | 26  | Rh.R_PSL_ROI   | 59 | -41 | 25  |
| Lh.L_RI_ROI    | -40 | -32 | 19  | Rh.R_RI_ROI    | 42 | -31 | 18  |
| Lh.L_RSC_ROI   | -8  | -36 | 21  | Rh.R_RSC_ROI   | 6  | -33 | 24  |
| Lh.L_s32_ROI   | -6  | 35  | -13 | Rh.R_s32_ROI   | 6  | 33  | -12 |
| Lh.L_s6-8_ROI  | -17 | 29  | 56  | Rh.R_s6-8_ROI  | 22 | 23  | 54  |
| Lh.L_SCEF_ROI  | -6  | 3   | 61  | Rh.R_SCEF_ROI  | 6  | 2   | 63  |
| Lh.L_SFL_ROI   | -7  | 18  | 65  | Rh.R_SFL_ROI   | 9  | 17  | 66  |
| Lh.L_STGa_ROI  | -51 | 16  | -17 | Rh.R_STGa_ROI  | 53 | 17  | -18 |
| Lh.L_STSda_ROI | -52 | -4  | -11 | Rh.R_STSda_ROI | 53 | -2  | -13 |
| Lh.L_STSdp_ROI | -52 | -31 | 3   | Rh.R_STSdp_ROI | 52 | -28 | -1  |
| Lh.L_STSva_ROI | -50 | -6  | -17 | Rh.R_STSva_ROI | 56 | -10 | -15 |
| Lh.L_STSvp_ROI | -58 | -30 | -2  | Rh.R_STSvp_ROI | 60 | -33 | -6  |
| Lh.L_STV_ROI   | -58 | -48 | 14  | Rh.R_STV_ROI   | 57 | -43 | 14  |
| Lh.L_TA2_ROI   | -51 | 5   | -7  | Rh.R_TA2_ROI   | 54 | 4   | -5  |
| Lh.L_TE1a_ROI  | -58 | -5  | -23 | Rh.R_TE1a_ROI  | 61 | -2  | -23 |
| Lh.L_TE1m_ROI  | -62 | -22 | -10 | Rh.R_TE1m_ROI  | 62 | -28 | -16 |
| Lh.L_TE1p_ROI  | -64 | -41 | -11 | Rh.R_TE1p_ROI  | 60 | -46 | -14 |
| Lh.L_TE2a_ROI  | -53 | -24 | -25 | Rh.R_TE2a_ROI  | 55 | -15 | -29 |
| Lh.L_TE2p_ROI  | -46 | -47 | -18 | Rh.R_TE2p_ROI  | 49 | -41 | -20 |
| Lh.L_TF_ROI    | -40 | -21 | -26 | Rh.R_TF_ROI    | 42 | -23 | -26 |
| Lh.L_TGd_ROI   | -37 | 16  | -31 | Rh.R_TGd_ROI   | 39 | 16  | -34 |
| Lh.L_TGv_ROI   | -38 | 4   | -39 | Rh.R_TGv_ROI   | 35 | 1   | -42 |
| Lh.L_TPOJ1_ROI | -54 | -46 | 6   | Rh.R_TPOJ1_ROI | 52 | -41 | 8   |
| Lh.L_TPOJ2_ROI | -52 | -62 | 9   | Rh.R_TPOJ2_ROI | 55 | -60 | 4   |
| Lh.L_TPOJ3_ROI | -42 | -68 | 19  | Rh.R_TPOJ3_ROI | 52 | -63 | 14  |
| Lh.L_V1_ROI    | -8  | -83 | 3   | Rh.R_V1_ROI    | 14 | -77 | 4   |
| Lh.L_v23ab_ROI | -6  | -53 | 23  | Rh.R_v23ab_ROI | 6  | -49 | 24  |
| Lh.L_V2_ROI    | -10 | -80 | 7   | Rh.R_V2_ROI    | 13 | -76 | 7   |
| Lh.L_V3A_ROI   | -17 | -89 | 33  | Rh.R_V3A_ROI   | 21 | -86 | 34  |
| Lh.L_V3B_ROI   | -26 | -80 | 24  | Rh.R_V3B_ROI   | 28 | -75 | 22  |

|               |     |     |     |               |    |     |     |
|---------------|-----|-----|-----|---------------|----|-----|-----|
| Lh.L_V3CD_ROI | -31 | -86 | 17  | Rh.R_V3CD_ROI | 33 | -85 | 19  |
| Lh.L_V3_ROI   | -14 | -86 | 8   | Rh.R_V3_ROI   | 20 | -84 | 9   |
| Lh.L_V4_ROI   | -26 | -87 | 4   | Rh.R_V4_ROI   | 30 | -85 | 2   |
| Lh.L_V4t_ROI  | -46 | -77 | 2   | Rh.R_V4t_ROI  | 47 | -75 | 1   |
| Lh.L_V6A_ROI  | -19 | -80 | 44  | Rh.R_V6A_ROI  | 29 | -80 | 46  |
| Lh.L_V6_ROI   | -11 | -78 | 34  | Rh.R_V6_ROI   | 18 | -72 | 32  |
| Lh.L_V7_ROI   | -21 | -79 | 35  | Rh.R_V7_ROI   | 28 | -78 | 34  |
| Lh.L_V8_ROI   | -26 | -77 | -13 | Rh.R_V8_ROI   | 26 | -77 | -12 |
| Lh.L_VIP_ROI  | -23 | -66 | 56  | Rh.R_VIP_ROI  | 15 | -60 | 63  |
| Lh.L_VMV1_ROI | -18 | -51 | -4  | Rh.R_VMV1_ROI | 17 | -49 | -4  |
| Lh.L_VMV2_ROI | -28 | -51 | -5  | Rh.R_VMV2_ROI | 28 | -51 | -6  |
| Lh.L_VMV3_ROI | -29 | -62 | -9  | Rh.R_VMV3_ROI | 27 | -60 | -8  |
| Lh.L_VVC_ROI  | -29 | -52 | -15 | Rh.R_VVC_ROI  | 27 | -47 | -16 |

Supplemental Table 2 The ROI with different participation coefficient between EOD and LOD

|                   | <i>F</i> | <i>P</i> |
|-------------------|----------|----------|
| Rh.OP2.3.ROI      | 10.89336 | 0.001471 |
| Lh.47s.ROI        | 10.25897 | 0.001988 |
| Lh.FFC.ROI        | 8.597889 | 0.004445 |
| Rh.IP2.ROI        | 7.248783 | 0.008724 |
| Rh.7Pm.ROI        | 7.039937 | 0.009702 |
| Rh.4.ROI          | 6.717525 | 0.011443 |
| Rh.STSdp.ROI      | 6.046562 | 0.016208 |
| Lh.Amygdala       | 6.042305 | 0.016244 |
| Lh.6a.ROI         | 5.955372 | 0.017002 |
| Lh.MI.ROI         | 5.892055 | 0.017577 |
| Rh.5L.ROI         | 5.696017 | 0.019492 |
| Lh.p47r.ROI       | 5.633629 | 0.020146 |
| Rh.OP4.ROI        | 5.053207 | 0.02748  |
| Rh.IFJa.ROI       | 4.811764 | 0.031324 |
| Rh.DVT.ROI        | 4.734196 | 0.032677 |
| Lh.6d.ROI         | 4.701463 | 0.033266 |
| Lh.45.ROI         | 4.543965 | 0.036267 |
| Rh.Accumbens.area | 4.370714 | 0.039905 |
| Rh.9m.ROI         | 4.363168 | 0.040072 |
| Rh.IFSp.ROI       | 4.325778 | 0.040911 |
| Lh.PBelt.ROI      | 4.310178 | 0.041267 |
| Rh.7m.ROI         | 4.163195 | 0.044785 |

Supplemental Table 3. The ROI with different within module degree z-score between EOD and LOD

|                   | <i>F</i> | <i>P</i> |
|-------------------|----------|----------|
| Rh.Accumbens.area | 13.25423 | 0.000494 |
| Lh.VMV1.ROI       | 10.37802 | 0.001878 |
| Rh.7Am.ROI        | 10.19616 | 0.002048 |
| Rh.8C.ROI         | 8.554824 | 0.00454  |
| Lh.PIT.ROI        | 8.314145 | 0.005114 |
| Lh.V4t.ROI        | 7.444993 | 0.007899 |
| Lh.PHT.ROI        | 7.080611 | 0.009502 |
| Rh.a32pr.ROI      | 7.025823 | 0.009772 |
| Lh.IFSp.ROI       | 7.012233 | 0.00984  |
| Lh.1.ROI          | 6.501074 | 0.012795 |
| Lh.LO2.ROI        | 6.35731  | 0.013784 |
| Lh.6a.ROI         | 6.269175 | 0.01443  |
| Lh.IFSa.ROI       | 6.194229 | 0.015004 |
| Lh.FFC.ROI        | 5.800807 | 0.018442 |
| Rh.PIT.ROI        | 5.389575 | 0.022939 |
| Lh.Pallidum       | 5.18984  | 0.02553  |
| Lh.RI.ROI         | 5.156159 | 0.025997 |
| Rh.STSdp.ROI      | 5.147003 | 0.026125 |
| Lh.V4.ROI         | 5.040348 | 0.027671 |
| Lh.5L.ROI         | 4.822085 | 0.031148 |
| Rh.IP0.ROI        | 4.623312 | 0.034721 |
| Rh.a24pr.ROI      | 4.407938 | 0.039092 |
| Rh.V2.ROI         | 4.323035 | 0.040973 |
| Lh.PGi.ROI        | 4.209164 | 0.043651 |
| Lh.LO3.ROI        | 4.150074 | 0.045115 |
| Lh.FOP3.ROI       | 4.115927 | 0.045984 |
| Rh.24dv.ROI       | 4.015546 | 0.048647 |
| Rh.47s.ROI        | 4.009236 | 0.048819 |

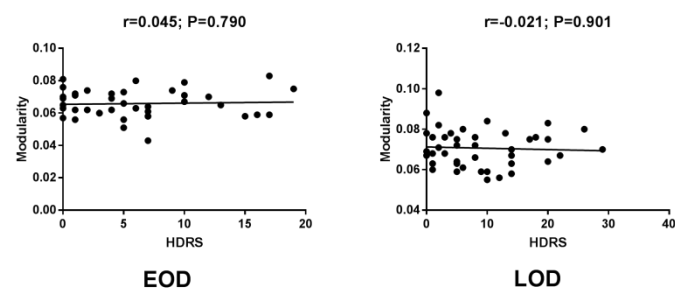

Supplemental Figure 1. The correlation between modularity and HDRS in LLD subjects (EOD and LOD) from (adjusted gender, years of education and age).
